# Supplementary material for: Impact of Liver Metastases and Number of Metastatic Sites on Immune-Checkpoint Inhibitors Efficacy in Patients with Different Solid Tumors: A Retrospective Study
Source: MDPI journal article supplement (doi:10.3390/biomedicines11010083), 2022-12-29
Supplement: s1 [file s1]

**A**

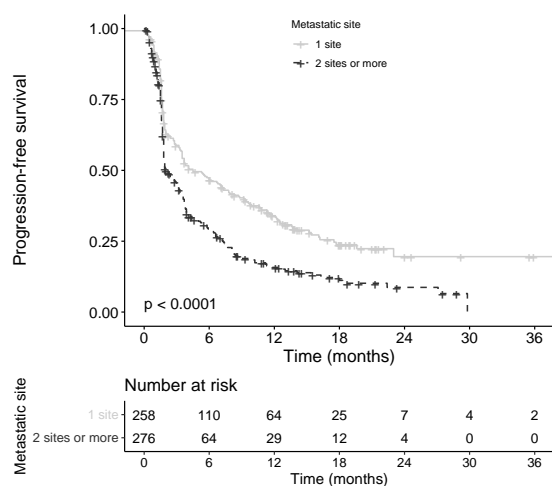

**B**

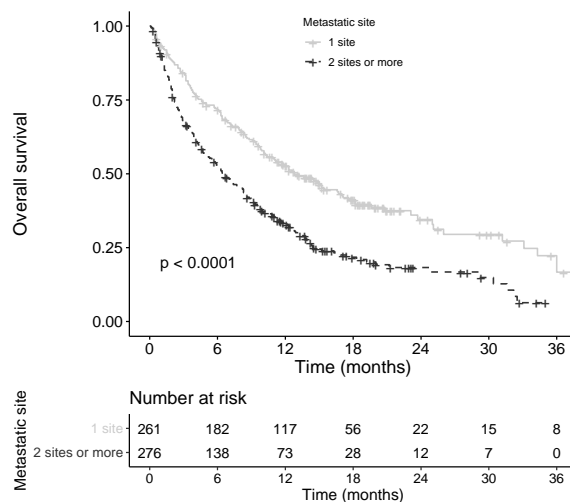

**C**

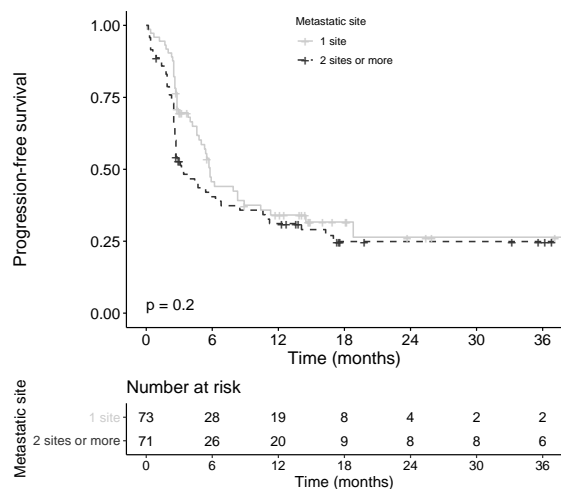

**D**

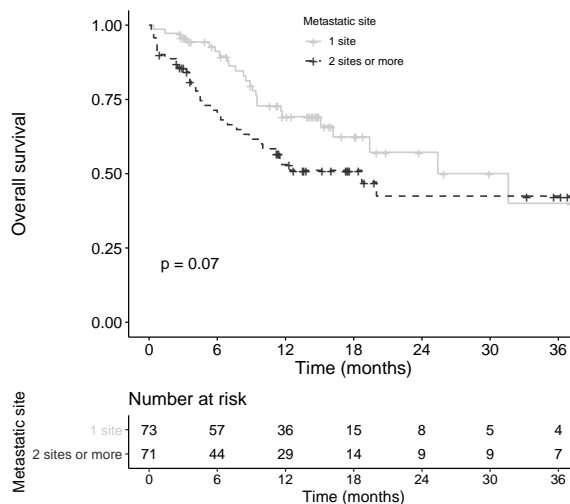

**Figure S1: Kaplan-Meier analyses.** (A) Progression-free survival (PFS) according to metastatic site (MS) number (1 MS versus  $\geq 2$  ML) in patients with metastatic NSCLC (B) Overall survival according to MS number (1 MS versus  $\geq 2$  ML) in patients with metastatic NSCLC. (C) Progression-free survival (PFS) according to metastatic site (MS) number (1 MS versus  $\geq 2$  ML) in patients with metastatic melanoma. (D) Overall survival according to MS number (1 MS versus  $\geq 2$  ML) in patients with metastatic melanoma.

**A**

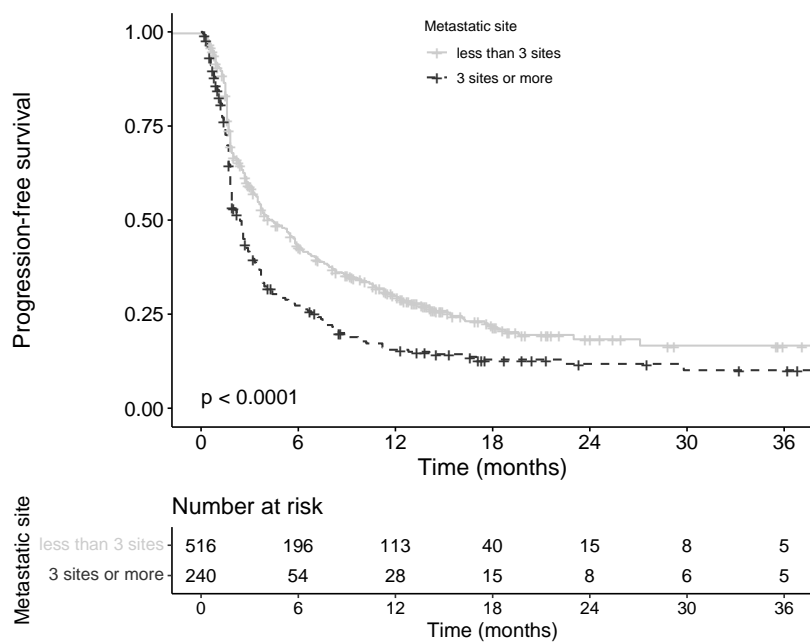

**B**

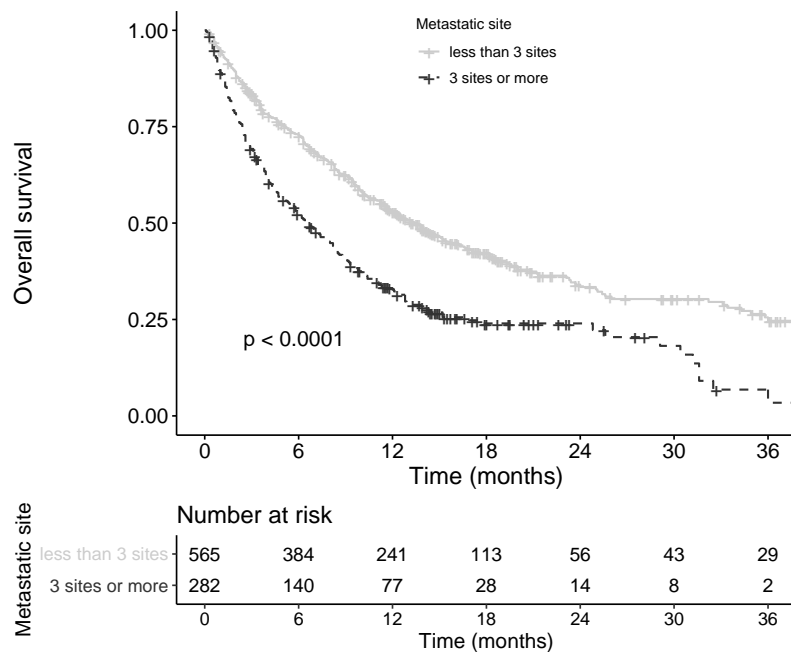

**Figure S2: Kaplan-Meier analyses.** (A) Progression-free survival (PFS) according to metastatic site (MS) number (< 3 MS versus  $\geq 3$  ML) (B) Overall survival according to MS number (< 3 MS versus  $\geq 3$  MS).

**A**

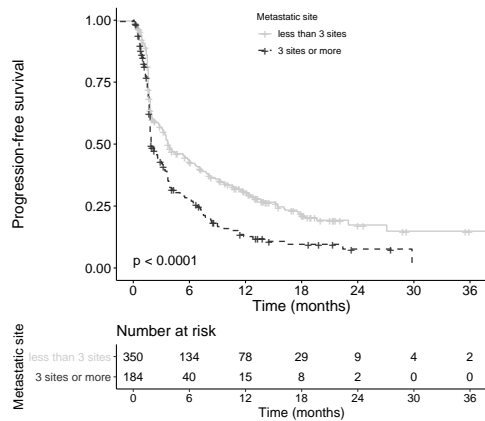

**B**

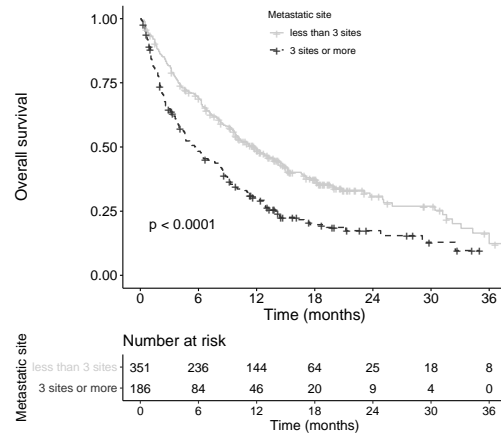

**C**

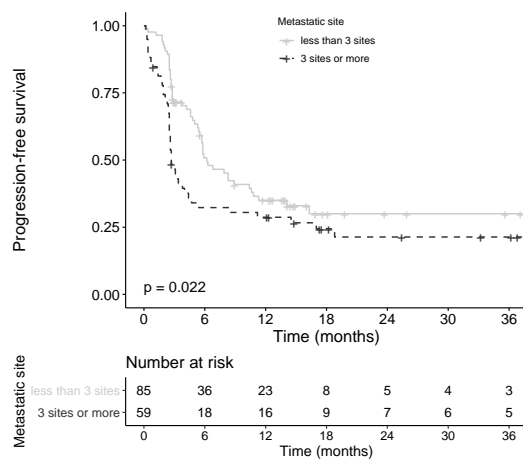

**D**

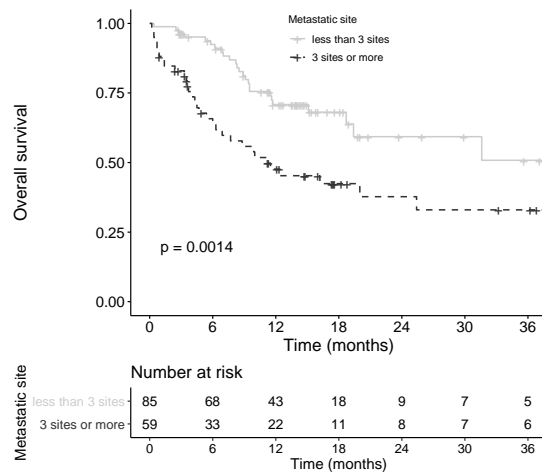

**Figure S3: Kaplan-Meier analyses.** (A) Progression-free survival (PFS) according to metastatic site (MS) number (< 3 MS versus  $\geq$  3 MS) in patients with metastatic NSCLC (B) Overall survival according to MS number (< 3 MS versus  $\geq$  3 MS) in patients with metastatic NSCLC. (C) Progression-free survival (PFS) according to metastatic site (MS) number (< 3 MS versus  $\geq$  3 MS) in patients with metastatic melanoma. (D) Overall survival according to MS number (< 3 MS versus  $\geq$  3 MS) in patients with metastatic melanoma.

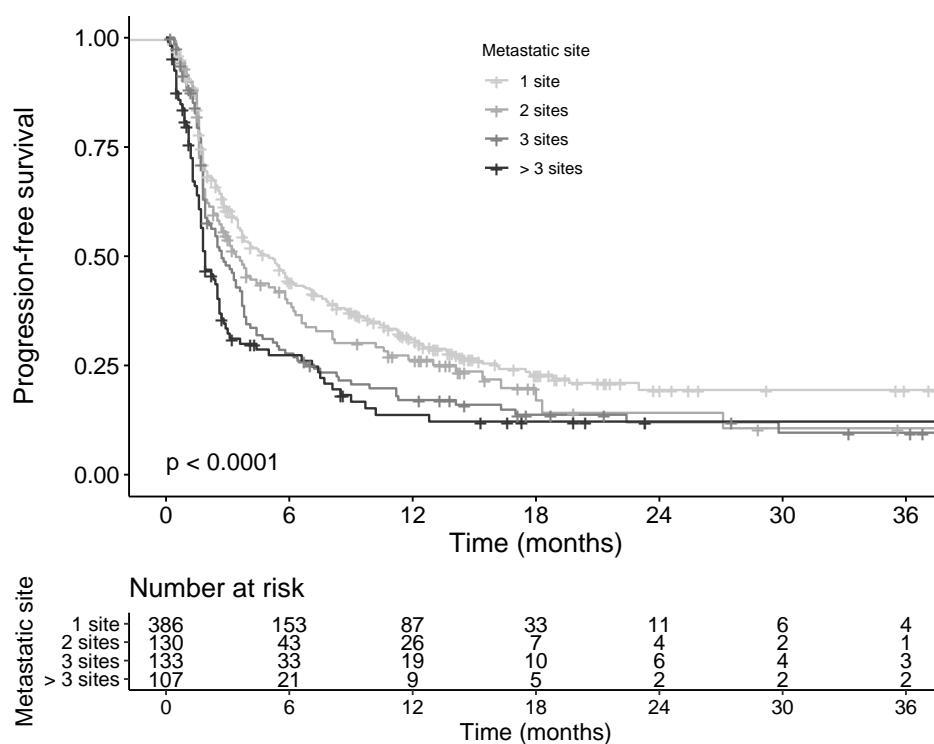

**Figure S4: Kaplan-Meier analyses.** Progression-free survival (PFS) according to metastatic site (MS) number (1MS versus 2MS versus 3MS versus >3MS).

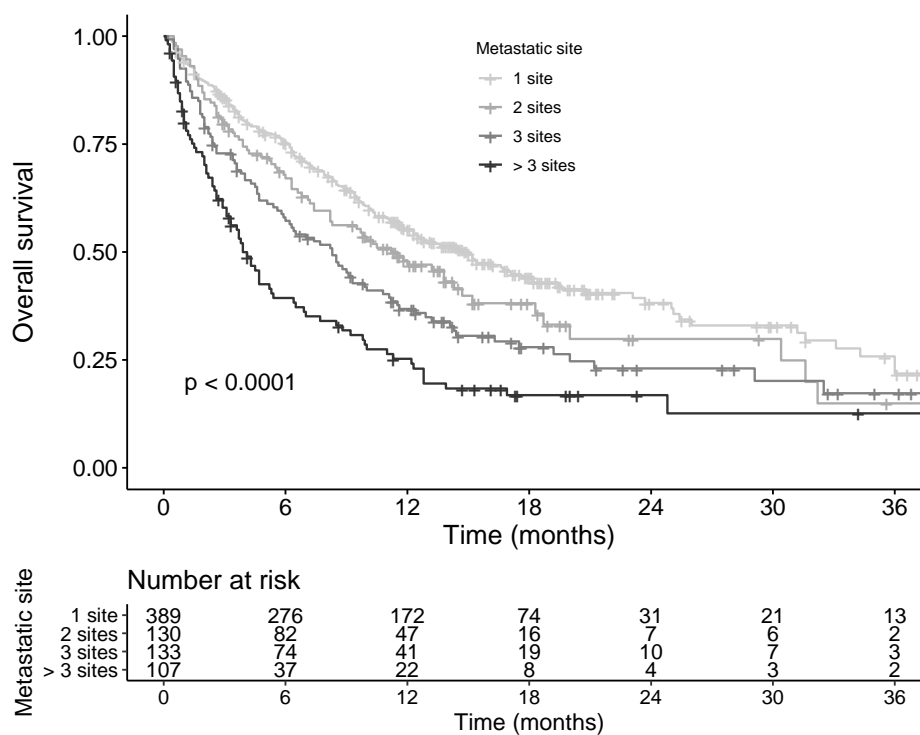

**Figure S5: Kaplan-Meier analyses.** Overall survival according to metastatic site (MS) number (1MS versus 2MS versus 3MS versus >3MS).

**Table S1. Progression-free survival prognostic factors in univariate and multivariate analysis (Cox model)**

| Characteristics              | N (%)     | Progression-free survival |                     |         |                   |         |
|------------------------------|-----------|---------------------------|---------------------|---------|-------------------|---------|
|                              |           |                           | Unadjusted analysis |         | Adjusted Analysis |         |
|                              |           | Median PFS (95% CI)       | HR (95%CI)          | P       | HR (95%CI)        | P       |
| <b>Age NA=0</b>              |           |                           |                     |         |                   |         |
| < 70                         | 489 (64%) | 3.2 (2.7-3.7)             | REF                 | 0.11    | REF               | 0.11    |
| ≥70                          | 270 (36%) | 4.1 (3.2-5.5)             | 0.87 (0.72-1.0)     |         | 1.6 (0.9-3.0)     |         |
| <b>PS &lt; 2 (%) NA=33</b>   | 534 (74%) | 4.4 (3.7-5.6)             | 0.55 (0.45-0.67)    | <0.0001 | 0.59 (0.48-0.71)  | <0.0001 |
| <b>PS ≥ 2</b>                | 192 (26%) | 1.9 (1.8-2.7)             | REF                 |         | REF               |         |
| <b>Primary tumor (%)</b>     |           |                           |                     |         |                   |         |
| <b>NA=0</b>                  |           |                           |                     |         |                   |         |
| <b>NSLC</b>                  | 537 (71%) | 3.3 (2.6-3.7)             | REF                 | 0.0014  | REF               | 0.0096  |
| <b>Melanoma</b>              | 144 (19%) | 5.4 (3.8-7.9)             | 0.69 (0.55-0.87)    |         | 0.73 (0.58-0.93)  |         |
| <b>Urologic</b>              | 78 (10%)  | 3.2 (2.3-5.0)             | 1.16 (0.89-1.51)    |         | 1.24 (0.95-1.64)  |         |
| <b>Nb of metastatic site</b> |           |                           |                     |         |                   |         |
| <b>1</b>                     | 389 (51%) | 5.0 (3.7-6.0)             | REF                 | <0.0001 | REF               | 0.061   |
| <b>&gt;1</b>                 | 370 (49%) | 2.6 (2.3-3.2)             | 1.41 (1.19-1.67)    |         | 1.19 (0.99-1.44)  |         |
| <b>Liver metastasis</b>      |           |                           |                     |         |                   |         |
| <b>No</b>                    | 592 (78%) | 4.0 (3.6-5.4)             | REF                 | <0.0001 | REF               | <0.0001 |
| <b>Yes</b>                   | 167 (22%) | 1.9 (1.8-2.5)             | 1.63 (1.34-1.98)    |         | 1.57 (1.27-1.96)  |         |
